# Supplementary material for: The Prevalence of Virulent and Multidrug-Resistant Enterococci in River Water and in Treated and Untreated Municipal and Hospital Wastewater
Source: PubMed Central journal article supplement (PMC7827636; doi:10.3390/ijerph18020563), 2021-01-11
Supplement: ijerph-18-00563-s001.pdf [file ijerph-18-00563-s001.pdf]

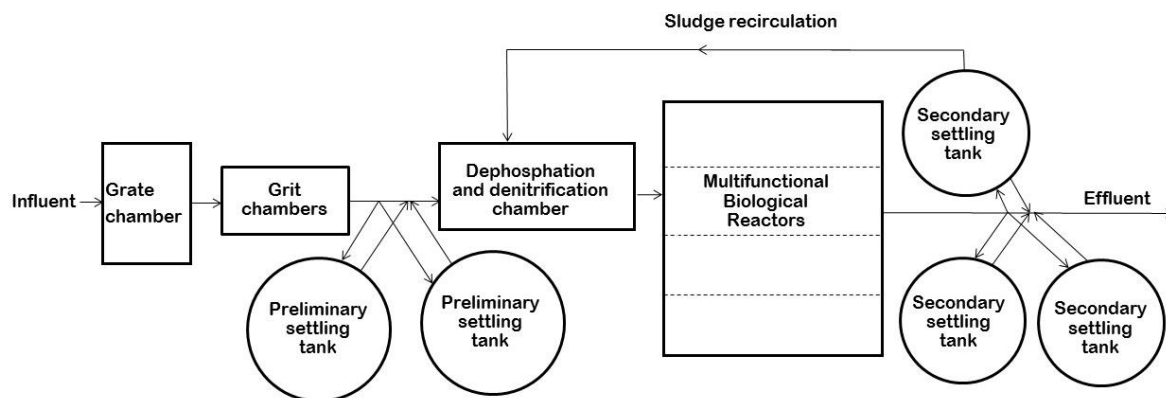

**Figure S1.** Technological scheme of Wastewater Treatment Plant

**Table S1.** Oligonucleotide sequences and product size of primers for identifying enterococci.

| Name                    | Gene                  | Sequences (5'-3')                                      | Lenght (bp) | References                                   |
|-------------------------|-----------------------|--------------------------------------------------------|-------------|----------------------------------------------|
| <i>Enterococcus</i>     | <i>tuf</i>            | TACTGACAAACCATTTCATGATG<br>AACTTCGTCACCAACGCGAAC       | 112         | Ke et al., [1]                               |
| <i>Enterococcus</i>     | <i>sodA</i>           | TCA ACC GGG GAG GGT<br>ATT ACT AGC GAT TCC GG          | 733         | Deasy et al., [2]                            |
| <i>E. faecalis</i>      | <i>ddl</i>            | ATCAAGTACAGTTAGTCTTTATTAG<br>ACGATTCAAAGCTAACTGAATCAGT | 941         | Kariyama et al., [3]                         |
| <i>E. faecium</i>       | <i>ddl</i>            | TTGAGGCAGACCAGATTGACG<br>TATGACAGCGACTCCGATTCC         | 658         | Cheng et al., [4]                            |
| <i>E. durans</i>        | <i>ddl</i>            | CCTACTGATATTAAGACAGCG<br>TAATCCTAAGATAGGTGTTTG         | 295         | Jackson et al., [5]                          |
| <i>E. hirae</i>         | <i>ddl</i>            | CTTTCTGATATGGATGCTGTC<br>TAAATTCTTCCTTAAATGTTG         | 187         |                                              |
| <i>E. avium</i>         | <i>ddl</i>            | GCTGCGATTGAAAAATATCCG<br>AAGCCAATGATCGGTGTTTT          | 368         |                                              |
| <i>E. gallinarum</i>    | <i>vanC1</i>          | GGTATCAAGGAAACCTC<br>CTTCCGCCATCATAGCT                 | 822         | Dutka-Malen et al., [6]                      |
| <i>E. casseliflavus</i> | <i>vanC2/C3</i>       | CGGGGAAGATGGCAGTAT<br>CGCAGGGACGGTGATTTT               | 484         | Kariyama et al., [3]                         |
| Control                 | <i>rrs</i> (16S rRNA) | GGATTAGATACCCTGGTAGTCC<br>TCGTTGCGGGACTTAACCCAAC       | 320         | Van de Klundert and Vliegenthart et al., [7] |

**Table S2.** Sequences of oligonucleotides and primers for identifying vancomycin resistance genes in enterococci.

| Gene            | Sequences (5'-3')                                      | Lenght (bp) | References           |
|-----------------|--------------------------------------------------------|-------------|----------------------|
| <i>vanA</i>     | CATGAATAGAATAAAAAGTTGCAATA<br>CCCCTTTAACGCTAATACGATCAA | 1.030       |                      |
| <i>vanB</i>     | GTGACAAACCGGAGGCGAGGA<br>CCGCCATCCTCTGCAAAAAA          | 433         | Kariyama et al., [3] |
| <i>vanC1</i>    | GGTATCAAGGAAACCTC<br>CTTCCGCCATCATAGCT                 | 822         |                      |
| <i>vanC2/C3</i> | CGGGGAAGATGGCAGTAT<br>CGCAGGGACGGTGATTTT               | 484         |                      |

**Table S3.** Sequences of oligonucleotides and primers for identifying virulence factors in enterococci

| Virulence factor             | Gene        | Sequences (5'-3')                                                              | Length (bp) | References                |
|------------------------------|-------------|--------------------------------------------------------------------------------|-------------|---------------------------|
| Cytolysin                    | <i>cylA</i> | Cyl1- <b>ACTCGGGGATTGATAGGC</b><br>Cyl2- <b>GCTGCTAAAGCTGCGCTT</b>             | 688         | Vankerckhoven et al., [8] |
| Hyaluronidase                | <i>hyl</i>  | Hyl1- <b>ACAGAAGAGCTGCAGGAAATG</b><br>Hyl2- <b>GACTGACGTCCAAGTTTCCAA</b>       | 276         |                           |
| Adhesion colaagen            | <i>ace</i>  | Ace1- <b>AAAGTAGAATTAGATCCACAC</b><br>Ace2- <b>TCTATCACATTCGGTTGCG</b>         | 320         | Mannu et al., [9]         |
| Antigen A                    | <i>efaA</i> | efaA1- <b>CGTGAGAAAGAAAATGGAGGA</b><br>efaA2- <b>CTACTAACACGTCACGAATG</b>      | 499         |                           |
| Gelatinase                   | <i>gelE</i> | gelE1- <b>AGTTCATGTCTATTTTCTTCAC</b><br>gelE2- <b>CTTCATTATTTACACGTTG</b>      | 402         |                           |
| Aggregation substance        | <i>as</i>   | AS1- <b>CCAGTAATCAGTCCAGAAACAACC</b><br>AS2- <b>TAGCTTTTTTCATTCTTGTTGTT</b>    | 406         |                           |
| Enterococcal surface protein | <i>esp</i>  | Esp1- <b>TTACCAAGATGGTTCTGTAGGCAC</b><br>Esp2- <b>CCAAGTATACTTAGCATCTTTTGG</b> | 913         | Shankar et al., [10]      |
| Sex pheromones               | <i>cpd</i>  | Cpd1- <b>TGGTGGGTTATTTTCAATTC</b><br>Cpd2- <b>TACGGCTCTGGCTACTA</b>            | 782         | Eaton and Gasson [11]     |
| Sex pheromones               | <i>cob</i>  | Cob1- <b>AACATTCAGCAAACAAAGC</b><br>Cob2- <b>TTGTCATAAAGAGTGGTCAT</b>          | 1405        |                           |
| Sex pheromones               | <i>ccf</i>  | Ccf1- <b>GGGAATTGAGTAGTGAAGAAG</b><br>Ccf2- <b>AGCCGCTAAAATCGGTAAAAT</b>       | 543         |                           |

**Table S4–Part A.** Correlations between the analyzed physicochemical parameters, total enterococcus counts, different species and the number of MDR and virulent strains (Spearman’s rank correlation coefficient; marked in red are values with  $p < 0.05$ ).

| Variable                                              | Season | Sampling sites | Temperature  | pH            | Dissolved oxygen (mg O <sub>2</sub> L <sup>-1</sup> ) | Enterococci (log cfu·100mL <sup>-1</sup> ) |
|-------------------------------------------------------|--------|----------------|--------------|---------------|-------------------------------------------------------|--------------------------------------------|
| Sampling sites                                        | 0.000  |                |              |               |                                                       |                                            |
| Temperature                                           | 0.374  | -0.086         |              |               |                                                       |                                            |
| pH                                                    | 0.337  | <b>-0.703</b>  | <b>0.530</b> |               |                                                       |                                            |
| Dissolved oxygen (mg O <sub>2</sub> L <sup>-1</sup> ) | -0.249 | <b>0.632</b>   | -0.200       | <b>-0.580</b> |                                                       |                                            |
| Enterococci (log cfu·100mL <sup>-1</sup> )            | 0.064  | <b>-0.886</b>  | 0.162        | <b>0.792</b>  | <b>-0.606</b>                                         |                                            |
| Other <i>Enterococcus</i> spp                         | 0.035  | -0.146         | -0.023       | 0.220         | 0.294                                                 | 0.199                                      |
| <i>E. faecalis</i>                                    | -0.304 | <b>-0.613</b>  | -0.183       | <b>0.466</b>  | -0.204                                                | <b>0.530</b>                               |
| <i>E. faecium</i>                                     | 0.179  | <b>-0.620</b>  | 0.058        | <b>0.657</b>  | <b>-0.495</b>                                         | <b>0.633</b>                               |
| <i>E. durans</i>                                      | -0.088 | -0.139         | 0.047        | 0.268         | -0.007                                                | 0.139                                      |
| <i>E. avium</i>                                       | -0.147 | <b>-0.599</b>  | -0.006       | 0.269         | -0.123                                                | <b>0.532</b>                               |
| <i>E. hiare</i>                                       | -0.163 | -0.184         | -0.209       | 0.185         | -0.043                                                | 0.179                                      |
| <i>E. gallinarum</i>                                  | 0.046  | 0.181          | -0.050       | -0.084        | -0.245                                                | -0.063                                     |
| <i>E. casseliflavus/flavescens</i>                    | 0.308  | -0.324         | -0.118       | 0.227         | <b>-0.575</b>                                         | 0.232                                      |
| AMP                                                   | 0.210  | <b>-0.680</b>  | -0.015       | <b>0.456</b>  | <b>-0.581</b>                                         | <b>0.506</b>                               |
| IPM                                                   | 0.158  | <b>-0.715</b>  | 0.046        | <b>0.569</b>  | <b>-0.541</b>                                         | <b>0.576</b>                               |
| GEN                                                   | 0.095  | <b>-0.681</b>  | 0.096        | <b>0.572</b>  | <b>-0.496</b>                                         | <b>0.534</b>                               |
| S                                                     | -0.023 | <b>-0.693</b>  | -0.046       | <b>0.605</b>  | -0.317                                                | <b>0.619</b>                               |
| TEC                                                   | -0.021 | -0.034         | 0.054        | 0.235         | 0.006                                                 | 0.229                                      |
| VAN                                                   | -0.237 | -0.292         | -0.105       | 0.347         | 0.129                                                 | 0.397                                      |
| QD                                                    | -0.069 | <b>-0.588</b>  | -0.103       | <b>0.572</b>  | -0.286                                                | <b>0.582</b>                               |
| TGC                                                   | 0.282  | <b>-0.678</b>  | -0.085       | <b>0.631</b>  | <b>-0.507</b>                                         | <b>0.673</b>                               |
| LZD                                                   | 0.208  | <b>-0.518</b>  | -0.094       | <b>0.550</b>  | -0.295                                                | <b>0.509</b>                               |

|                  |        |        |        |        |        |        |
|------------------|--------|--------|--------|--------|--------|--------|
| NIT              | 0.344  | -0.554 | 0.148  | 0.713  | -0.388 | 0.591  |
| W5               | 0.168  | -0.639 | 0.014  | 0.670  | -0.354 | 0.646  |
| CIP              | 0.096  | -0.671 | -0.003 | 0.671  | -0.377 | 0.633  |
| DO               | -0.129 | -0.012 | -0.205 | 0.092  | 0.381  | 0.053  |
| <i>vanA</i>      | 0.088  | 0.092  | -0.234 | -0.324 | -0.049 | -0.131 |
| <i>vanB</i>      | -0.198 | -0.256 | -0.201 | 0.021  | -0.136 | 0.198  |
| <i>vanC1</i>     | -0.178 | -0.259 | 0.162  | 0.350  | -0.046 | 0.331  |
| <i>vanC2/VC3</i> | 0.140  | -0.497 | 0.343  | 0.555  | -0.600 | 0.527  |
| <i>cylA</i>      | -0.081 | -0.428 | -0.099 | 0.320  | -0.400 | 0.365  |
| <i>hyl</i>       | 0.044  | -0.267 | 0.233  | 0.486  | 0.051  | 0.304  |
| <i>ace</i>       | -0.342 | -0.262 | -0.047 | 0.337  | 0.058  | 0.338  |
| <i>efaA</i>      | -0.342 | -0.436 | -0.183 | 0.381  | -0.130 | 0.422  |
| <i>gelE</i>      | -0.422 | -0.306 | -0.037 | 0.278  | -0.043 | 0.254  |
| <i>as</i>        | -0.227 | -0.556 | -0.019 | 0.396  | -0.237 | 0.446  |
| <i>esp</i>       | -0.064 | -0.214 | -0.116 | 0.287  | -0.166 | 0.173  |
| <i>cob</i>       | -0.430 | -0.291 | -0.135 | 0.162  | 0.210  | 0.273  |
| <i>cpd</i>       | -0.356 | -0.459 | -0.088 | 0.374  | -0.032 | 0.441  |
| <i>ccf</i>       | -0.347 | -0.512 | -0.135 | 0.372  | -0.108 | 0.474  |

AMP–ampicillin; IPM–imipenem; GEN–gentamicin; S–streptomycin; TEC–teicoplanin; VAN–vancomycin; QD–quinupristin/dalfopristin; TGC–tigecycline; LZD–linezolid; NIT–nitrofurantoin; W5–trimethoprim; CIP–ciprofloxacin; DO–doxycycline; vancomycin resistance genes (*vanA*–*C2/C3*); virulence factors: cytolysin (*cylA*), aggregation substance (AS), gelatinase (*gel E*), hyaluronidase (*hyl*), endocarditis antigen (*efaA*), factor encoding surface protein (*esp*), and sex pheromones (*cob*, *cpd* and *ccf*)

Table S4–Part B

| Variable                           | Other                   |                 | <i>Enterococcus</i> : |               |              |              |                   | <i>casseliflavus/</i><br><i>flavescens</i> |
|------------------------------------|-------------------------|-----------------|-----------------------|---------------|--------------|--------------|-------------------|--------------------------------------------|
|                                    | <i>Enterococcus</i> spp | <i>faecalis</i> | <i>faecium</i>        | <i>durans</i> | <i>avium</i> | <i>hiare</i> | <i>gallinarum</i> |                                            |
| <i>E. faecalis</i>                 | 0.213                   |                 |                       |               |              |              |                   |                                            |
| <i>E. faecium</i>                  | -0.001                  | 0.668           |                       |               |              |              |                   |                                            |
| <i>E. durans</i>                   | 0.496                   | 0.466           | 0.295                 |               |              |              |                   |                                            |
| <i>E. avium</i>                    | 0.009                   | 0.381           | 0.279                 | -0.148        |              |              |                   |                                            |
| <i>E. hiare</i>                    | 0.420                   | 0.549           | 0.177                 | 0.876         | 0.022        |              |                   |                                            |
| <i>E. gallinarum</i>               | 0.066                   | -0.007          | -0.020                | 0.101         | -0.121       | 0.133        |                   |                                            |
| <i>E. casseliflavus/flavescens</i> | -0.243                  | 0.242           | 0.512                 | 0.360         | 0.076        | 0.393        | 0.118             |                                            |
| AMP                                | -0.031                  | 0.446           | 0.659                 | 0.324         | 0.338        | 0.277        | -0.046            | 0.703                                      |
| IPM                                | 0.029                   | 0.596           | 0.711                 | 0.305         | 0.403        | 0.301        | -0.036            | 0.583                                      |
| GEN                                | 0.093                   | 0.573           | 0.721                 | 0.445         | 0.354        | 0.347        | -0.047            | 0.598                                      |
| S                                  | 0.243                   | 0.863           | 0.805                 | 0.591         | 0.429        | 0.604        | -0.132            | 0.500                                      |
| TEC                                | 0.565                   | 0.368           | 0.283                 | 0.593         | -0.064       | 0.532        | 0.465             | -0.091                                     |
| VAN                                | 0.468                   | 0.777           | 0.527                 | 0.439         | 0.305        | 0.460        | 0.169             | -0.129                                     |
| QD                                 | 0.231                   | 0.890           | 0.760                 | 0.581         | 0.406        | 0.675        | 0.006             | 0.473                                      |
| TGC                                | 0.018                   | 0.629           | 0.807                 | 0.240         | 0.423        | 0.334        | -0.092            | 0.636                                      |
| LZD                                | 0.069                   | 0.712           | 0.826                 | 0.395         | 0.338        | 0.450        | -0.091            | 0.614                                      |
| NIT                                | 0.107                   | 0.613           | 0.845                 | 0.397         | 0.273        | 0.366        | -0.091            | 0.580                                      |
| W5                                 | 0.268                   | 0.790           | 0.885                 | 0.504         | 0.390        | 0.496        | -0.026            | 0.501                                      |
| CIP                                | 0.231                   | 0.772           | 0.819                 | 0.534         | 0.314        | 0.530        | -0.142            | 0.581                                      |
| DO                                 | 0.239                   | 0.584           | 0.355                 | 0.212         | 0.041        | 0.236        | -0.026            | -0.128                                     |
| <i>vanA</i>                        | 0.025                   | -0.074          | -0.031                | -0.128        | -0.077       | -0.119       | 0.435             | -0.075                                     |
| <i>vanB</i>                        | -0.209                  | 0.396           | 0.297                 | -0.331        | 0.505        | -0.182       | 0.227             | -0.194                                     |
| <i>vanC1</i>                       | -0.007                  | 0.537           | 0.581                 | -0.044        | 0.450        | -0.115       | 0.221             | -0.135                                     |
| <i>vanC2/VC3</i>                   | 0.028                   | 0.181           | 0.211                 | -0.031        | 0.007        | -0.008       | 0.080             | 0.251                                      |
| <i>cylA</i>                        | 0.127                   | 0.625           | 0.755                 | 0.490         | 0.210        | 0.384        | 0.211             | 0.478                                      |

|             |        |       |       |       |       |       |       |        |
|-------------|--------|-------|-------|-------|-------|-------|-------|--------|
| <i>hyl</i>  | 0.446  | 0.595 | 0.599 | 0.559 | 0.080 | 0.376 | 0.036 | -0.010 |
| <i>ace</i>  | 0.260  | 0.737 | 0.560 | 0.291 | 0.240 | 0.257 | 0.110 | -0.214 |
| <i>efaA</i> | 0.343  | 0.886 | 0.633 | 0.591 | 0.335 | 0.635 | 0.140 | 0.185  |
| <i>gelE</i> | 0.299  | 0.724 | 0.524 | 0.418 | 0.143 | 0.304 | 0.154 | -0.150 |
| <i>as</i>   | 0,134  | 0,813 | 0,770 | 0,465 | 0,422 | 0,351 | 0,087 | 0,343  |
| <i>esp</i>  | -0,138 | 0,714 | 0,735 | 0,187 | 0,168 | 0,194 | 0,171 | 0,310  |
| <i>cob</i>  | 0,206  | 0,766 | 0,482 | 0,244 | 0,469 | 0,252 | 0,023 | -0,183 |
| <i>cpd</i>  | 0,259  | 0,886 | 0,644 | 0,395 | 0,506 | 0,404 | 0,142 | 0,063  |
| <i>ccf</i>  | 0,256  | 0,906 | 0,664 | 0,420 | 0,511 | 0,461 | 0,128 | 0,133  |

Table S4–Part C

| Variable         | AMP    | IPM   | GEN   | S      | TEC    | VAN    | QD     | TGC    | LZD    | NIT    | W5     | CIP    | DO     |
|------------------|--------|-------|-------|--------|--------|--------|--------|--------|--------|--------|--------|--------|--------|
| IPM              | 0.944  |       |       |        |        |        |        |        |        |        |        |        |        |
| GEN              | 0.925  | 0.938 |       |        |        |        |        |        |        |        |        |        |        |
| S                | 0.730  | 0.818 | 0.817 |        |        |        |        |        |        |        |        |        |        |
| TEC              | -0.005 | 0.097 | 0.133 | 0.360  |        |        |        |        |        |        |        |        |        |
| VAN              | 0.098  | 0.293 | 0.260 | 0.646  | 0.740  |        |        |        |        |        |        |        |        |
| QD               | 0.549  | 0.681 | 0.654 | 0.949  | 0.450  | 0.740  |        |        |        |        |        |        |        |
| TGC              | 0.785  | 0.863 | 0.786 | 0.842  | 0.131  | 0.385  | 0.801  |        |        |        |        |        |        |
| LZD              | 0.673  | 0.773 | 0.722 | 0.890  | 0.221  | 0.534  | 0.892  | 0.933  |        |        |        |        |        |
| NIT              | 0.678  | 0.783 | 0.770 | 0.846  | 0.255  | 0.463  | 0.819  | 0.923  | 0.952  |        |        |        |        |
| W5               | 0.667  | 0.776 | 0.770 | 0.948  | 0.459  | 0.682  | 0.930  | 0.885  | 0.924  | 0.920  |        |        |        |
| CIP              | 0.746  | 0.841 | 0.820 | 0.951  | 0.262  | 0.539  | 0.908  | 0.901  | 0.937  | 0.925  | 0.935  |        |        |
| DO               | 0.004  | 0.193 | 0.076 | 0.439  | 0.305  | 0.737  | 0.527  | 0.298  | 0.529  | 0.406  | 0.444  | 0.447  |        |
| <i>vanA</i>      | 0.211  | 0.200 | 0.069 | -0.071 | 0.347  | 0.124  | -0.138 | -0.003 | -0.092 | -0.130 | -0.020 | -0.139 | 0.061  |
| <i>vanB</i>      | 0.123  | 0.225 | 0.064 | 0.216  | 0.176  | 0.472  | 0.252  | 0.187  | 0.155  | 0.024  | 0.228  | 0.052  | 0.304  |
| <i>vanC1</i>     | 0.003  | 0.167 | 0.163 | 0.372  | 0.334  | 0.691  | 0.462  | 0.236  | 0.354  | 0.329  | 0.467  | 0.288  | 0.491  |
| <i>vanC2/VC3</i> | 0.265  | 0.382 | 0.350 | 0.182  | -0.062 | -0.093 | 0.178  | 0.360  | 0.201  | 0.365  | 0.234  | 0.349  | -0.156 |
| <i>cylA</i>      | 0.597  | 0.592 | 0.656 | 0.714  | 0.506  | 0.520  | 0.662  | 0.531  | 0.556  | 0.517  | 0.733  | 0.611  | 0.119  |
| <i>hyl</i>       | 0.316  | 0.471 | 0.559 | 0.675  | 0.658  | 0.724  | 0.630  | 0.450  | 0.580  | 0.655  | 0.723  | 0.614  | 0.520  |
| <i>ace</i>       | -0.028 | 0.156 | 0.204 | 0.535  | 0.618  | 0.882  | 0.623  | 0.257  | 0.401  | 0.362  | 0.581  | 0.396  | 0.572  |
| <i>efaA</i>      | 0.342  | 0.480 | 0.505 | 0.811  | 0.644  | 0.860  | 0.869  | 0.508  | 0.621  | 0.527  | 0.782  | 0.678  | 0.481  |
| <i>gelE</i>      | 0.185  | 0.312 | 0.372 | 0.561  | 0.609  | 0.776  | 0.555  | 0.189  | 0.298  | 0.256  | 0.528  | 0.396  | 0.427  |
| <i>as</i>        | 0,576  | 0,622 | 0,652 | 0,797  | 0,359  | 0,680  | 0,750  | 0,522  | 0,620  | 0,545  | 0,746  | 0,689  | 0,438  |
| <i>esp</i>       | 0,315  | 0,456 | 0,389 | 0,624  | 0,269  | 0,645  | 0,709  | 0,536  | 0,705  | 0,593  | 0,673  | 0,600  | 0,669  |
| <i>cob</i>       | 0,065  | 0,232 | 0,219 | 0,568  | 0,464  | 0,883  | 0,627  | 0,252  | 0,420  | 0,300  | 0,544  | 0,398  | 0,686  |
| <i>cpd</i>       | 0,267  | 0,428 | 0,450 | 0,741  | 0,510  | 0,886  | 0,800  | 0,456  | 0,589  | 0,500  | 0,728  | 0,605  | 0,589  |
| <i>ccf</i>       | 0,340  | 0,494 | 0,493 | 0,792  | 0,535  | 0,876  | 0,842  | 0,512  | 0,621  | 0,520  | 0,770  | 0,649  | 0,546  |

Table S4–Part D

| Variable         | <i>van A</i> | <i>van B</i> | <i>van C1</i> | <i>van C2/C3</i> | <i>cylA</i> | <i>hyl</i> | <i>ace</i> | <i>efaA</i> | <i>gelE</i> | <i>as</i> | <i>esp</i> | <i>cob</i> | <i>cpd</i> |
|------------------|--------------|--------------|---------------|------------------|-------------|------------|------------|-------------|-------------|-----------|------------|------------|------------|
| <i>vanB</i>      | 0,459        |              |               |                  |             |            |            |             |             |           |            |            |            |
| <i>vanC1</i>     | -0,047       | 0,643        |               |                  |             |            |            |             |             |           |            |            |            |
| <i>vanC2/VC3</i> | -0,153       | -0,270       | -0,052        |                  |             |            |            |             |             |           |            |            |            |
| <i>cylA</i>      | 0,243        | 0,363        | 0,446         | -0,008           |             |            |            |             |             |           |            |            |            |
| <i>hyl</i>       | 0,096        | 0,122        | 0,470         | 0,068            | 0,537       |            |            |             |             |           |            |            |            |
| <i>ace</i>       | -0,023       | 0,510        | 0,807         | -0,082           | 0,553       | 0,709      |            |             |             |           |            |            |            |
| <i>efaA</i>      | 0,025        | 0,421        | 0,583         | -0,016           | 0,786       | 0,672      | 0,829      |             |             |           |            |            |            |
| <i>gelE</i>      | 0,178        | 0,519        | 0,659         | -0,099           | 0,721       | 0,692      | 0,877      | 0,851       |             |           |            |            |            |
| <i>as</i>        | 0,065        | 0,456        | 0,666         | -0,022           | 0,822       | 0,557      | 0,653      | 0,811       | 0,764       |           |            |            |            |
| <i>esp</i>       | 0,047        | 0,540        | 0,732         | -0,037           | 0,624       | 0,501      | 0,679      | 0,696       | 0,625       | 0,739     |            |            |            |
| <i>cob</i>       | 0,063        | 0,623        | 0,809         | -0,230           | 0,494       | 0,585      | 0,884      | 0,795       | 0,800       | 0,762     | 0,686      |            |            |

|            |        |       |       |        |       |       |       |       |       |       |       |       |       |
|------------|--------|-------|-------|--------|-------|-------|-------|-------|-------|-------|-------|-------|-------|
| <i>cpd</i> | -0,026 | 0,533 | 0,805 | -0,023 | 0,664 | 0,658 | 0,885 | 0,912 | 0,827 | 0,866 | 0,748 | 0,932 |       |
| <i>ccf</i> | 0,042  | 0,556 | 0,741 | 0,001  | 0,734 | 0,641 | 0,856 | 0,950 | 0,834 | 0,877 | 0,747 | 0,905 | 0,984 |

**Table S5.** Number and percentage of antibiotic resistant enterococci in wastewater and river water

| Antibiotic Sampling sites |     | Number (%) of resistant <i>Enterococci</i> : |                 |               |              |              |                   |                                  | Other <i>Enterococcus spp</i> |
|---------------------------|-----|----------------------------------------------|-----------------|---------------|--------------|--------------|-------------------|----------------------------------|-------------------------------|
|                           |     | <i>faecium</i>                               | <i>faecalis</i> | <i>durans</i> | <i>avium</i> | <i>hirae</i> | <i>gallinarum</i> | <i>casseliflavus/ flavescens</i> |                               |
| AMP                       | HWW | 26(72.2)                                     | 7(26.9)         | 1(100)        | 0.0          | 1(50.0)      | 0                 | 0.0                              | 9(90)                         |
|                           | UWW | 6(21.4)                                      | 0(0.0)          | 0.0           | 0.0          | 0.0          | 0.0               | 0.0                              | 1(8.3)                        |
|                           | TWW | 10(26.3)                                     | 1(3.4)          | 1(33.3)       | 0.0          | 1(25.0)      | 0.0               | 0.0                              | 2(9.5)                        |
|                           | URW | 0.0                                          | 0.0             | 0.0           | 0.0          | 0.0          | 0.0               | 0.0                              | 0.0                           |
|                           | DRW | 1(25)                                        | 0.0             | 0.0           | 0.0          | 0.0          | 1(20.0)           | 0.0                              | 1(16.6)                       |
| IPM                       | HWW | 26(72.2)                                     | 8(30.8)         | 1(100)        | 1(14.3)      | 1(50)        | 0.0               | 0.0                              | 8(80.0)                       |
|                           | UWW | 7(25.0)                                      | 3(15.0)         | 0.0           | 0.0          | 0.0          | 0.0               | 0.0                              | 3(25.0)                       |
|                           | TWW | 10(26.3)                                     | 8(27.6)         | 1(33.3)       | 0.0          | 1(25.0)      | 0.0               | 0.0                              | 2(9.5)                        |
|                           | URW | 0.0                                          | 0.0             | 0.0           | 0.0          | 0.0          | 0.0               | 0.0                              | 0.0                           |
|                           | DRW | 2(50)                                        | 1(100)          | 0.0           | 0.0          | 0.0          | 1 (20)            | 0.0                              | 3(50)                         |
| GEN                       | HWW | 22(61.1)                                     | 14(53.8)        | 1(100)        | 2(28.6)      | 0.0          | 0.0               | 1(100)                           | 8(80)                         |
|                           | UWW | 5(17.8)                                      | 3(15.0)         | 0.0           | 1(25.0)      | 0.0          | 0.0               | 0.0                              | 1(8.3)                        |
|                           | TWW | 9(23.7)                                      | 11(37.9)        | 1(33.3)       | 1(50)        | 1(25.0)      | 0.0               | 0.0                              | 1(4.8)                        |
|                           | URW | 0.0                                          | 0.0             | 0.0           | 0.0          | 0.0          | 0.0               | 0.0                              | 0.0                           |
|                           | DRW | 3(75)                                        | 0.0             | 0.0           | 0.0          | 0.0          | 0.0               | 0.0                              | 1(16.6)                       |
| S                         | HWW | 36(100)                                      | 25(96.2)        | 1(100)        | 7(100)       | 2(100)       | 1(100)            | 1(100)                           | 10(100)                       |
|                           | UWW | 22(78.6)                                     | 17(85.0)        | 0.0           | 3(75.0)      | 1(100)       | 0.0               | 0.0                              | 7(58.3)                       |
|                           | TWW | 33(86.8)                                     | 27(93.1)        | 3(100)        | 2(100)       | 4(100)       | 1(100)            | 0.0                              | 10(47.6)                      |
|                           | URW | 0.0                                          | 4(80)           | 0.0           | 0.0          | 0.0          | 0.0               | 0.0                              | 4(33.3)                       |
|                           | DRW | 3 (75)                                       | 0.0             | 0.0           | 0.0          | 0.0          | 0.0               | 0.0                              | 2(33.3)                       |
| TEC                       | HWW | 2(5.6)                                       | 2(7.7)          | 0.0           | 1(14.3)      | 1(50)        | 0.0               | 1(100)                           | 0.0                           |
|                           | UWW | 6(21.4)                                      | 4(20.0)         | 0.0           | 1(25.0)      | 0.0          | 1(33.3)           | 0.0                              | 9(75.0)                       |
|                           | TWW | 4(10.5)                                      | 9(31)           | 0.0           | 0.0          | 0.0          | 0.0               | 0.0                              | 11(52.4)                      |
|                           | URW | 0.0                                          | 0.0             | 0.0           | 0.0          | 0.0          | 0.0               | 0.0                              | 2(16.6)                       |
|                           | DRW | 4 (100)                                      | 1(100)          | 0.0           | 0.0          | 0.0          | 3(60)             | 0.0                              | 5(83.3)                       |
| VAN                       | HWW | 8(22.2)                                      | 9(34.6)         | 0.0           | 1(14.3)      | 0.0          | 1(100)            | 1(100)                           | 1(10)                         |
|                           | UWW | 15(53.6)                                     | 14(70.0)        | 0.0           | 0.0          | 0.0          | 3(100)            | 0.0                              | 6(50.0)                       |
|                           | TWW | 22(57.9)                                     | 18(62.1)        | 0.0           | 0.0          | 3(75.0)      | 1(100)            | 0.0                              | 13(61.9)                      |
|                           | URW | 0.0                                          | 1 (20)          | 0.0           | 0.0          | 0.0          | 0.0               | 0.0                              | 2(16.6)                       |
|                           | DRW | 3 (75)                                       | 1(100)          | 0.0           | 0.0          | 0.0          | 3(60)             | 0.0                              | 5(83.3)                       |
| QD                        | HWW | 23(63.9)                                     | 24(92.3)        | 1(100)        | 6(85.7)      | 2(100)       | 1(100)            | 1(100)                           | 6(60)                         |
|                           | UWW | 20(71.4)                                     | 17(85.0)        | 0.0           | 4(100)       | 1(100)       | 1(33.3)           | 0.0                              | 11(91.7)                      |
|                           | TWW | 27(71.1)                                     | 27(93.1)        | 2(66.7)       | 2(100)       | 4(100)       | 1(100)            | 0.0                              | 13(61.9)                      |
|                           | URW | 0.0                                          | 3(60)           | 0.0           | 0.0          | 0.0          | 0.0               | 0.0                              | 5(41.6)                       |
|                           | DRW | 3 (75)                                       | 1(100)          | 0.0           | 0.0          | 0.0          | 2(40)             | 0.0                              | 4(66.6)                       |
| TGC                       | HWW | 16(44.4)                                     | 19(73.1)        | 1(100)        | 3(42.9)      | 1(50)        | 0.0               | 0.0                              | 5(50)                         |
|                           | UWW | 12(42.9)                                     | 7(35.0)         | 0.0           | 2(50.0)      | 1(100)       | 0.0               | 0.0                              | 4(33.3)                       |
|                           | TWW | 13(34.2)                                     | 12(41.4)        | 0.0           | 1(50)        | 1(25.0)      | 0.0               | 0.0                              | 3(14.3)                       |
|                           | URW | 0.0                                          | 0.0             | 0.0           | 0.0          | 0.0          | 0.0               | 0.0                              | 0.0                           |
|                           | DRW | 0.0                                          | 0.0             | 0.0           | 0.0          | 0.0          | 1(20)             | 0.0                              | 5(83.3)                       |
| LZD                       | HWW | 23(63.9)                                     | 18(69.2)        | 1(100)        | 3(42.9)      | 2(100)       | 1(100)            | 1(100)                           | 5(50)                         |
|                           | UWW | 16(57.1)                                     | 9(45.0)         | 0.0           | 2(50.0)      | 1(100)       | 0.0               | 0.0                              | 4(33.3)                       |
|                           | TWW | 25(65.8)                                     | 19(65.5)        | 2(66.7)       | 2(100)       | 2(50)        | 1(100)            | 0.0                              | 6(28.6)                       |
|                           | URW | 0.0                                          | 1(20)           | 0.0           | 0.0          | 0.0          | 0.0               | 0.0                              | 4(33.3)                       |
|                           | DRW | 4(100)                                       | 0.0             | 0.0           | 0.0          | 0.0          | 1(20)             | 0.0                              | 4(66.6)                       |
| NIT                       | HWW | 26(72.2)                                     | 11(42.3)        | 1(100)        | 3(42.9)      | 2(100)       | 1(100)            | 0.0                              | 5(50)                         |
|                           | UWW | 13(46.4)                                     | 9(45.0)         | 0.0           | 2(50.0)      | 1(100)       | 0.0               | 0.0                              | 6(50.0)                       |



|            |     |              |             |         |         |         |         |         |         |
|------------|-----|--------------|-------------|---------|---------|---------|---------|---------|---------|
|            | DRW | 2(50.0)      | 1(10.0)     | 0.0     | 0.0     | 0.0     | 2(40.0) | 0.0     | 1(16.6) |
| <i>as</i>  | HWW | 4(11.1)      | 10.0(38.5)  | 0.0     | 4(57.1) | 1(10.0) | 1(10.0) | 1(10.0) | 2(20.0) |
|            | UWW | 4(14.3)      | 6(30.0)     | 0.0     | 0.0     | 1(10.0) | 0.0     | 0.0     | 0.0     |
|            | TWW | 8(21.1)      | 13(44.8)    | 2(66.7) | 2(10.0) | 0.0     | 0.0     | 0.0     | 0.0     |
|            | URW | 0.0          | 1(20.0)     | 0.0     | 0.0     | 0.0     | 0.0     | 0.0     | 1(8.3)  |
|            | DRW | 2(50.0)      | 0.0         | 0.0     | 0.0     | 0.0     | 0.0     | 0.0     | 0.0     |
| <i>esp</i> | HWW | 2(5.6)       | 9(34.6)     | 0.0     | 1(14.3) | 0.0     | 1(10.0) | 0.0     | 0.0     |
|            | UWW | 6(21.4)      | 1(5.0)      | 0.0     | 1(25.0) | 0.0     | 0.0     | 0.0     | 1(8.3)  |
|            | TWW | 7(18.4)      | 12(41.4)    | 13(3.3) | 1(50.0) | 0.0     | 0.0     | 0.0     | 1(4.8)  |
|            | URW | 0.0          | 2(40.0)     | 0.0     | 0.0     | 0.0     | 0.0     | 0.0     | 1(8.3)  |
|            | DRW | 2(50.0)      | 1(10.0)     | 0.0     | 0.0     | 0.0     | 4(80.0) | 0.0     | 0.0     |
| <i>cob</i> | HWW | 0.0          | 10.0(38.5)  | 0.0     | 5(71.4) | 0.0     | 0.0     | 0.0     | 3(30.0) |
|            | UWW | 10.0(35.7)   | 9(45.0)     | 0.0     | 1(25.0) | 0.0     | 0.0     | 0.0     | 1(8.3)  |
|            | TWW | 10.0(26.0)3) | 24(82.8)    | 2(66.7) | 1(50.0) | 0.0     | 0.0     | 0.0     | 2(9.5)  |
|            | URW | 0.0          | 2(40.0)     | 0.0     | 0.0     | 0.0     | 0.0     | 0.0     | 1(8.3)  |
|            | DRW | 3(75)        | 0.0         | 0.0     | 0.0     | 0.0     | 1(20.0) | 0.0     | 1(16.6) |
| <i>cpd</i> | HWW | 4(11.1)      | 20.0(76.9)) | 0.0     | 6(85.7) | 0.0     | 0.0     | 0.0     | 3(30.0) |
|            | UWW | 13(46.6)     | 14(70.0)    | 0.0     | 1(25.0) | 0.0     | 1(33.3) | 0.0     | 2(16.7) |
|            | TWW | 14(36.8)     | 29(10.0)    | 2(66.7) | 1(50.0) | 1(25.0) | 0.0     | 0.0     | 4(19.0) |
|            | URW | 0.0          | 3(60.0)     | 0.0     | 0.0     | 0.0     | 0.0     | 0.0     | 1(8.3)  |
|            | DRW | 2(50.0)      | 0.0         | 0.0     | 0.0     | 0.0     | 4(80.0) | 0.0     | 1(16.6) |
| <i>ccf</i> | HWW | 7(19.4)      | 22(84.6)    | 0.0     | 7(10.0) | 0.0     | 1(10.0) | 0.0     | 3(30.0) |
|            | UWW | 16(57.1)     | 14(70.0)    | 0.0     | 2(50.0) | 0.0     | 2(66.7) | 0.0     | 2(16.7) |
|            | TWW | 15(39.5)     | 29(10.0)    | 2(66.7) | 1(50.0) | 3(75.0) | 1(10.0) | 0.0     | 3(14.3) |
|            | URW | 0.0          | 3(60.0)     | 0.0     | 0.0     | 0.0     | 0.0     | 0.0     | 2(16.6) |
|            | DRW | 3(75)        | 0.0         | 0.0     | 0.0     | 0.0     | 4.80.0) | 0.0     | 1(16.6) |

virulence factors: cytotoxin (cylA), aggregation substance (AS), gelatinase (gel E), hyaluronidase (hyl), endocarditis antigen (efaA), factor encoding surface protein (esp), and sex pheromones (cob, cpd and ccf); HWW – hospital waste water; UWW and TWW – untreated and treated wastewater; URW and DRW – upstream and downstream river water;

## References

1. Ke, D.; Picard, F.J.; Martineau, F.; Menard, C.; Roy, P.H.; Ouellette, M. Bergeron M.G. Development of a PCR assay for rapid detection of enterococci. *J. Clin. Microbiol.* **1999**, *37*, 3497 – 3503. <https://doi.org/10.1128/JCM.37.11.3497-3503.1999>.
2. Deasy, B.M.; Rea, M.C.; Fitzgerald, G.F.; Cogan, T.M.; Beresford, T.P. A rapid PCR based method to distinguish between *Lactococcus* and *Enterococcus*. *Syst. Appl Microbiol.* **2000**, *23*, 510 – 522. [https://doi.org/10.1016/S0723-2020\(00\)80025-9](https://doi.org/10.1016/S0723-2020(00)80025-9).
3. Kariyama, R.; Mitsuhata, R.; Chow, J.W.; Clewell, D.B.; Kumon, H. Simple and reliable multiplex PCR assay for surveillance isolates of vancomycin resistant enterococci. *J. Clin. Microbiol.* **2000**, *38*, 3092 – 3095. <https://doi.org/10.1128/JCM.38.8.3092-3095.2000>.
4. Cheng, S.; McCleskey, F.K.; Gress, M.J.; Petroziello, J.M.; Liu, R.; Namdari, H.; Beninga, K.; Salmen, A.; DelVecchio, V.G. A PCR assay for identification of *Enterococcus faecium*. *J. Clin. Microbiol.* **1997**, *35*, 1248 – 1250. <https://doi.org/10.1128/JCM.35.5.1248-1250.1997>.
5. Jackson, C.R.; Fedorka-Cray, P.J.; Barrett, J.B. Use of a genus- and species-specific multiplex PCR for identification of enterococci. *J. Clin. Microbiol.* **2004**, *42*, 3558 – 3565. <https://doi.org/10.1128/JCM.42.8.3558-3565.2004>.

6. Dutka-Malen, S.; Evers, S.; Courvalin, P. Detection of glycopeptide resistance genotypes and identification to the species level of clinically relevant enterococci by PCR. *J. Clin. Microbiol.* **1995**, *33*, 24 – 27. <https://doi.org/10.1128/JCM.33.1.24-27.1995>.
7. Van de Klundert, J.A.M.; Vliegthart, J.S. PCR detection of genes coding for aminoglycoside-modifying enzymes. In: Persing D.H., Smith T.F., Tenover F.C., White T.J., editors. Diagnostic molecular microbiology. Washington, D.C.: ASM, **1993**, 547 – 552.
8. Vankerckhoven, V.; Van Autgaerden, T.; Vael, C.; Lammens, C.; Chapelle, S.; Rossi, R.; Jabes, D.; Goossens, H. Development of a Multiplex PCR for the Detection of *asa1*, *gelE*, *cylA*, *esp*, and *hyl* Genes in Enterococci and Survey for Virulence Determinants among European Hospital Isolates of *Enterococcus faecium*. *J. Clin. Microbiol.* **2004**, *42*(10), 4473 – 4479. <https://doi.org/10.1128/JCM.42.10.4473-4479.2004>.
9. Mannu, L.; Paba, A.; Daga, E.; Comunian, R.; Zanetti, S.; Duprè, I.; Sechi, L.A. Comparison of the incidence of virulence determinants and antibiotic resistance between *Enterococcus faecium* strains of dairy, animal and clinical origin. *Int. J. Food Microbiol.* **2003**, *88*(2-3), 291 – 304. [https://doi.org/10.1016/S0168-1605\(03\)00191-0](https://doi.org/10.1016/S0168-1605(03)00191-0).
10. Shankar, V.; Baghdayan, A.S.; Huycke, M.M.; Lindahl, G.; Gilmore, M.S. Infection-derived *Enterococcus faecalis* strains are enriched in *esp*, a gene encoding a novel surface protein. *Infect. Immun.* **1999**, *67*, 193 – 200. <https://doi.org/10.1128/IAI.67.1.193-200.1999>.
11. Eaton, T.J.; Gasson, M.J. Molecular screening of *Enterococcus* virulence determinants and potential for genetic exchange between food and medical isolates. *Appl. Environ. Microbiol.* **2001**, *67*, 1628 – 1635. <https://dx.doi.org/10.1128/AEM.67.4.1628-1635.2001>.
